# Supplementary material for: Wearable 3-D Photoacoustic Tomography for Functional Brain Imaging in Behaving Rats
Source: PubMed Central journal article supplement (PMC4857106; doi:10.1038/srep25470), 2016-05-05
Supplement: srep25470-s1.pdf [file srep25470-s1.pdf]

# Wearable 3-D Photoacoustic Tomography for Functional Brain Imaging in Behaving Rats

Jianbo Tang<sup>1</sup>, Jason E. Coleman<sup>2</sup>, Xianjin Dai<sup>1</sup>, and Huabei Jiang<sup>1,3\*</sup>

<sup>1</sup>J. Crayton Pruitt Family Department of Biomedical Engineering, University of Florida, Gainesville, FL 32611, USA

<sup>2</sup>Child Health Research Institute, Department of Pediatrics, College of Medicine, University of Florida, Gainesville, FL 32610, USA

<sup>3</sup>School of Physical Electronics, University of Electronic Science and Technology of China, Chengdu, Sichuan, China

\*Corresponding Author: Huabei Jiang, E-mail: [hjiang@bme.ufl.edu](mailto:hjiang@bme.ufl.edu).

## Supplementary figure

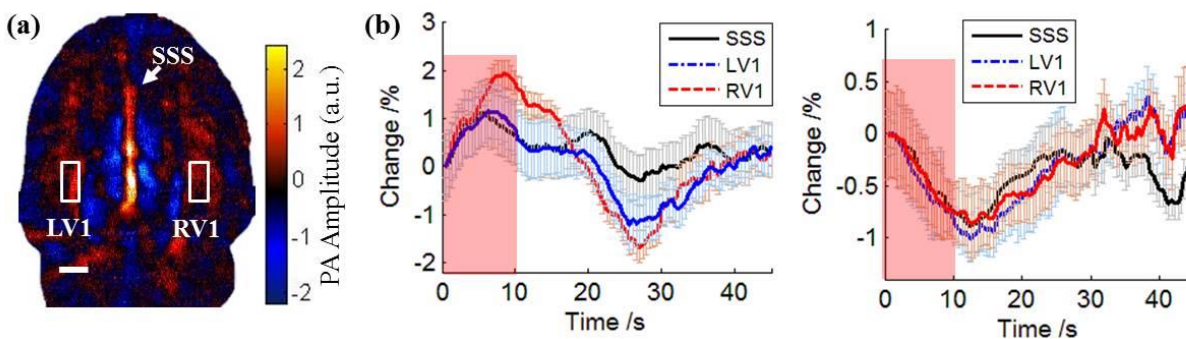

**SupFig. 1** Visual stimulation result for rat #2

(a) The wPAT image from top layer (cortex layer). Three ROIs were marked on the wPAT image. RV1: right primary visual cortex (V1); LV1: left primary visual cortex (V1); SSS: superior sagittal sinus. (b) CBV response averaged across the 9 trials (superimposed with standard error of the mean, n=9) for all ROIs. Right, CBV response under 710 nm light excitation (HbR); Left, CBV response under 840 nm light excitation (HbO). Length of scalebar: 1 mm. The red shading represents 10 s stimulus.
